# Supplementary material
Source: Springer Nature journal article supplement (https://www.springermedizin.de/resource/supplementary/12879_2012_2288_MOESM2_ESM.pdf/9445454)

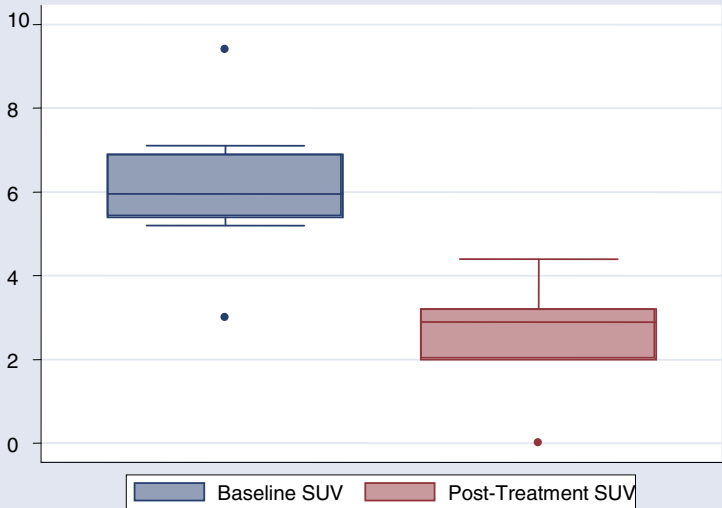

Supplement: MOESM2 [file 9445454]
